# Supplementary material
Source: PubMed Central journal article supplement (PMC6943475)
Supplement: ajtr0011-7644-f7.pdf [file ajtr0011-7644-f7.pdf]

## Low-dose decitabine and chidamide promote apoptosis of myeloid leukemia cells

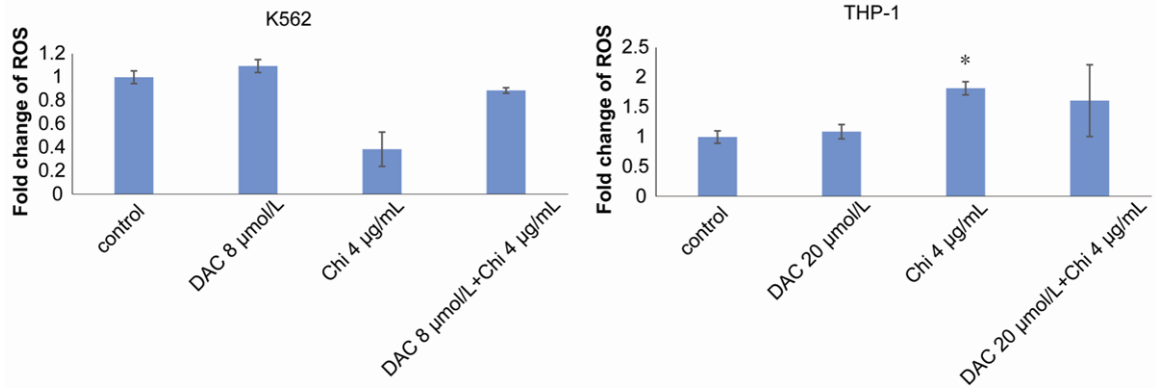

**Supplementary Figure 1.** Levels of intracellular ROS induced by 4 µg/mL chidamide or decitabine (8 µmol/L in K562 cells or 20 µmol/L in THP-1 cells) alone or in combination after 72 h of incubation were detected by flow cytometry. “\*” represents a significant difference compared with the control (\* $P < 0.05$ ).

Low-dose decitabine and chidamide promote apoptosis of myeloid leukemia cells

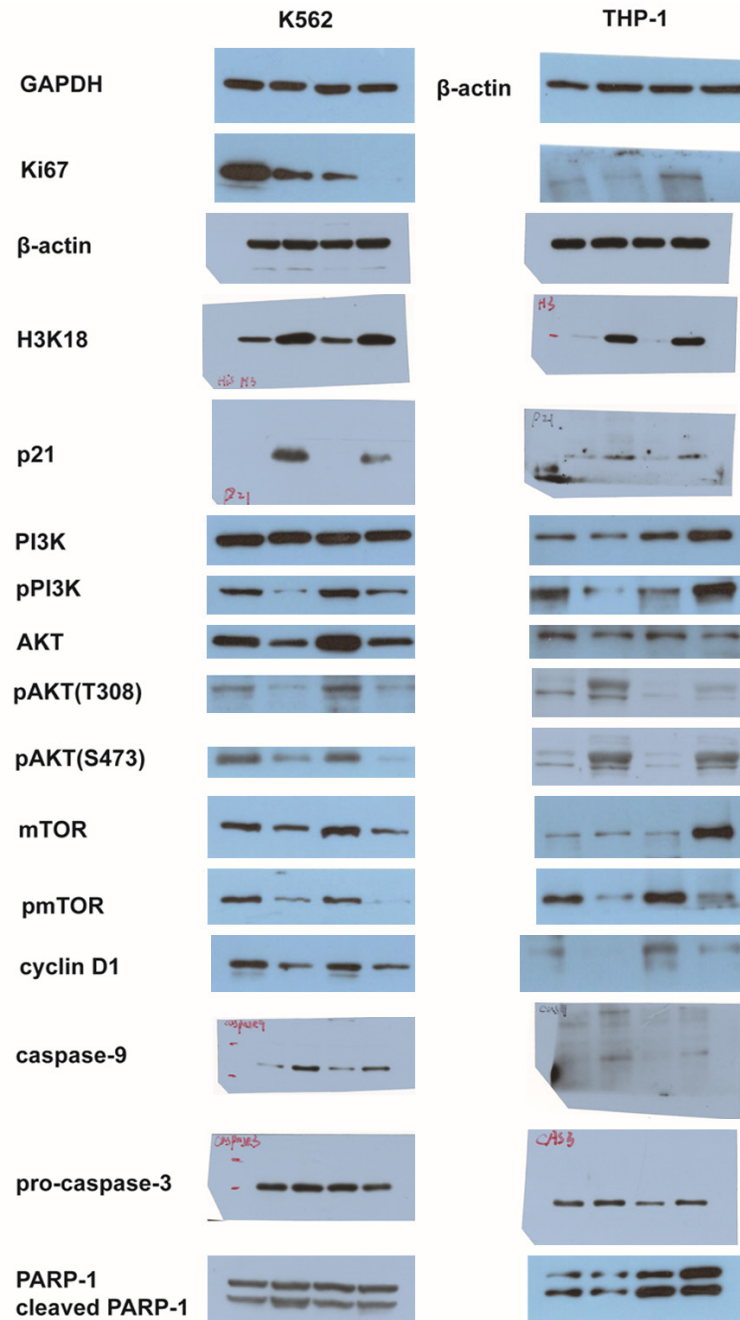

**Supplementary Figure 2.** Original western blotting images for all relevant bands in **Figure 1** (Ki67), **Figure 2** (Ac-H3K18), **Figure 3** (P21), **Figure 4** (PI3K, p-PI3K, AKT, p-AKT, mTOR, p-mTOR, cyclin D1) and **Figure 5** (caspase 3, caspase 9, PARP-1 and cleaved PARP-1).
